# Supplementary material for: Pt-Based Electrocatalyst Modified by CsH2PO4/SiP2O7 for Electrochemical Oxidation of NH3 to H2 in Solid Acid Electrolysis Cell
Source: MDPI journal article supplement (doi:10.3390/catal13040707), 2023-04-06
Supplement: s1 [file s1]

# Pt-Based Electrocatalyst Modified by $\text{CsH}_2\text{PO}_4/\text{SiP}_2\text{O}_7$ for Electrochemical Oxidation of $\text{NH}_3$ to $\text{H}_2$ in Solid Acid Electrolysis Cell

Jihoon Kim <sup>1,†</sup>, Daehee Jang <sup>1,†</sup>, Junil Choi <sup>1</sup>, Junbeom Maeng <sup>1</sup>, Hyun Ho Shin <sup>1</sup>, Taiho Park <sup>1</sup> and Won Bae Kim <sup>1,2,\*</sup>

<sup>1</sup> Department of Chemical Engineering, Pohang University of Science and Technology (POSTECH), 77 Cheongam-ro, Nam-gu, Pohang, Gyeongbuk 37673, Republic of Korea

<sup>2</sup> Graduate Institute of Ferrous & Energy Materials Technology, Pohang University of Science and Technology (POSTECH), 77 Cheongam-ro, Nam-gu, Pohang, Gyeongbuk 37673, Republic of Korea

\* Correspondence: kimwb@postech.ac.kr; Tel.: 82-54-279-2397; Fax: 82-54-279-5528

† These authors contributed equally to this work.

**Table S1.** Electrochemical impedance parameters of Pt/C\_CDP/SPO-x catalysts at open circuit voltage under 60 mL min<sup>-1</sup> ammonia flow rate condition.

| Catalyst       | L <sub>1</sub> (H)       | R <sub>s</sub> (Ω) | R <sub>1</sub> (Ω) | R <sub>2</sub> (Ω) |
|----------------|--------------------------|--------------------|--------------------|--------------------|
| Pt/C_CDP/SPO-3 | 104.0 × 10 <sup>-9</sup> | 1.92               | 1.57               | 9.59               |
| Pt/C_CDP/SPO-6 | 94.7 × 10 <sup>-9</sup>  | 1.84               | 0.58               | 9.36               |
| Pt/C_CDP/SPO-9 | 96.8 × 10 <sup>-9</sup>  | 1.83               | 0.44               | 12.47              |

**Table S2.** Analyses of ammonia crossover during the electrochemical AOR in the SAEC for 60 min.

| Volume of water trap | Concentration of NH <sub>3</sub> in water trap | NH <sub>3</sub> crossover | Reaction time | Inlet gas flow rate  | NH <sub>3</sub> concentration of outlet flow |
|----------------------|------------------------------------------------|---------------------------|---------------|----------------------|----------------------------------------------|
| mL                   | μM                                             | μmol                      | min           | mL min <sup>-1</sup> | ppm                                          |
| 15.0                 | 5.6                                            | 0.083                     | 60.0          | 30.0                 | 0.96                                         |

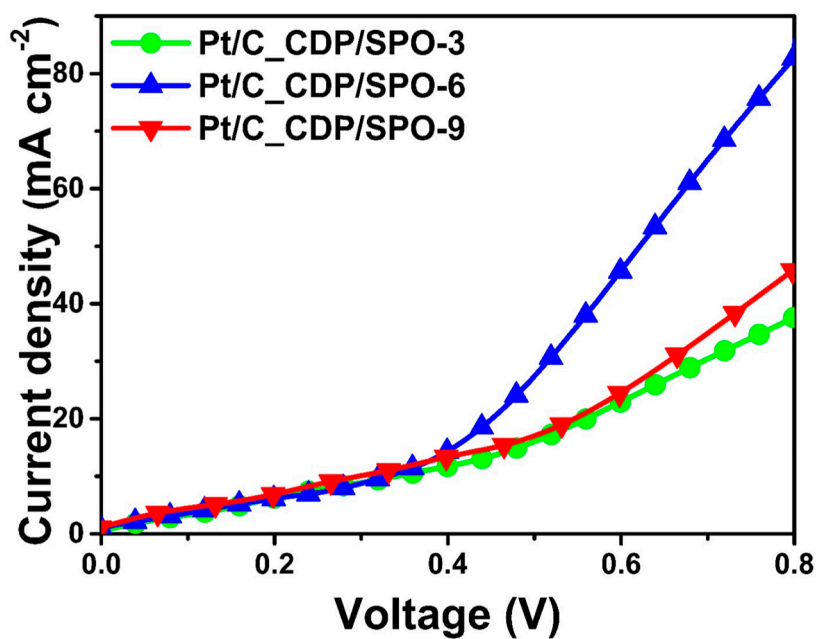

**Figure S1** Linear sweep voltammetry (LSV) curves of Pt/C\_CDP/SPO-x catalysts for AOR from 0 to 0.8 V at  $10 \text{ mV s}^{-1}$  scan rate.

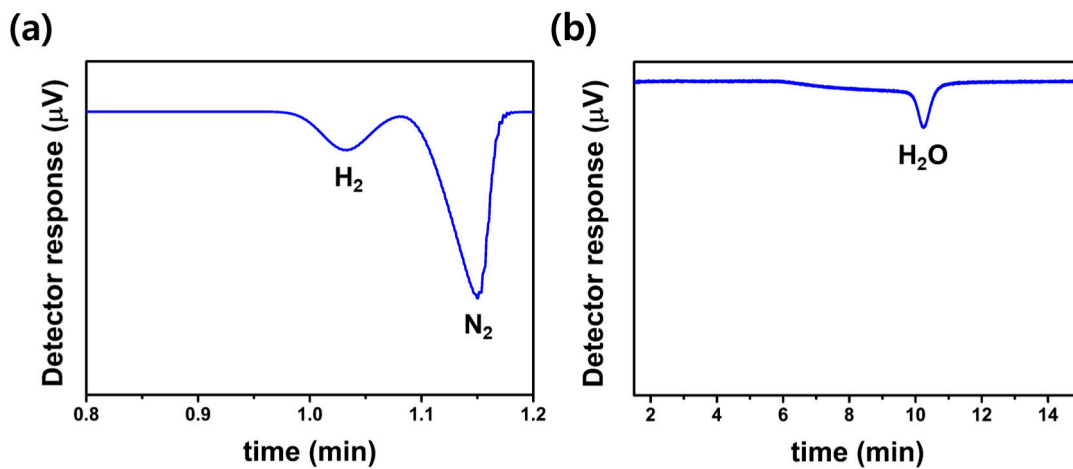

**Figure S2** GC-TCD analysis of cathode outlet gas for the AOR using the Pt/C\_CDP/SPO-6 catalyst at 0.8 V at a flow rate of  $\text{NH}_3$  of  $60 \text{ mL min}^{-1}$  (a) from 0.8 to 1.2 min and (b) from 1.2 to 15 min.

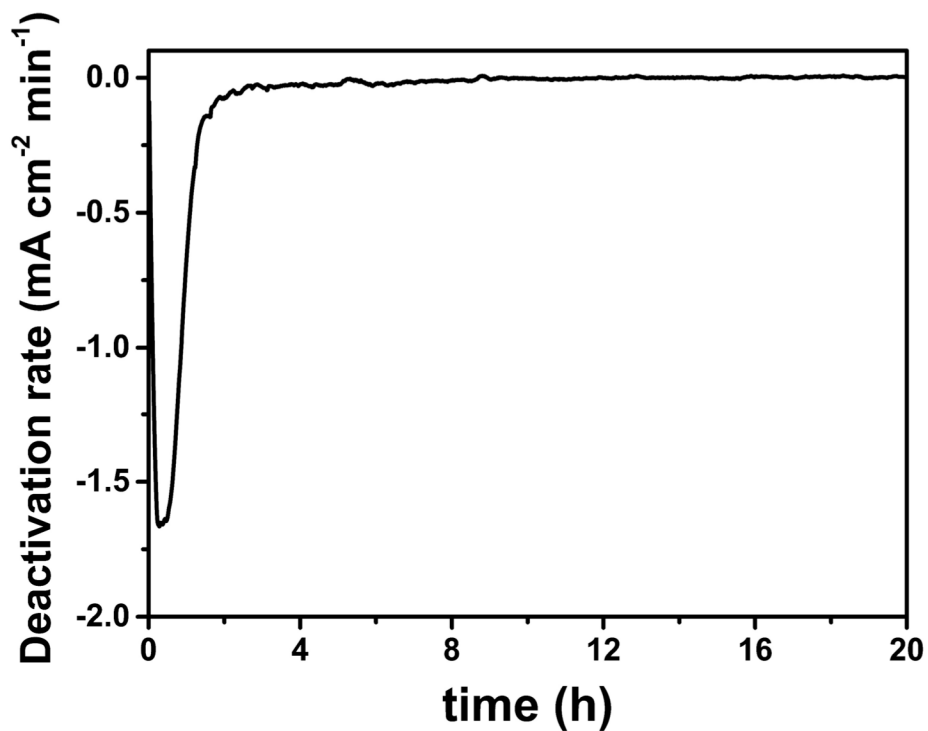

**Figure S3** Deactivation rate of the Pt/C\_CDP/SPO-6 catalyst at ammonia flow rate of 60 mL min<sup>-1</sup> at 0.8 V for 20 h.

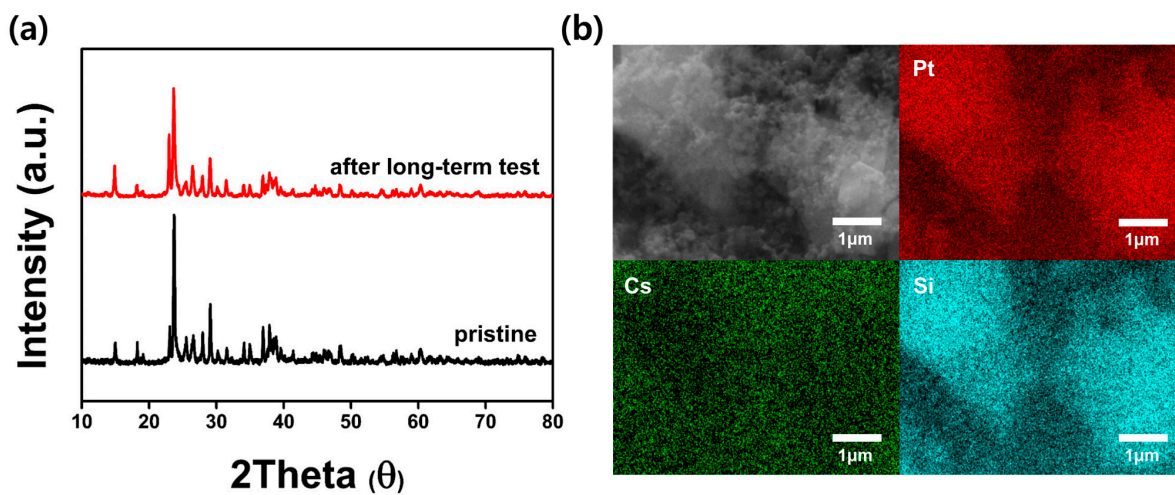

**Figure S4** (a) XRD patterns of the pristine Pt/C\_CDP/SPO-6 and after the long-term stability test. (b) SEM images and EDS elemental mapping of Pt, Cs and Si of Pt/C\_CDP/SPO-6 after stability test.

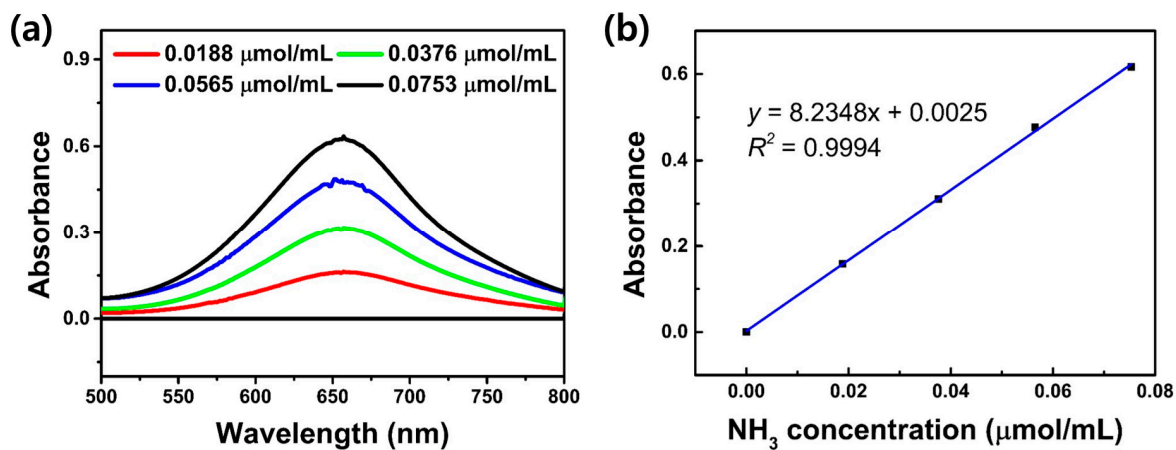

**Figure S5** (a) UV-vis absorption spectra and (b) calibration curve for the indophenol blue method.

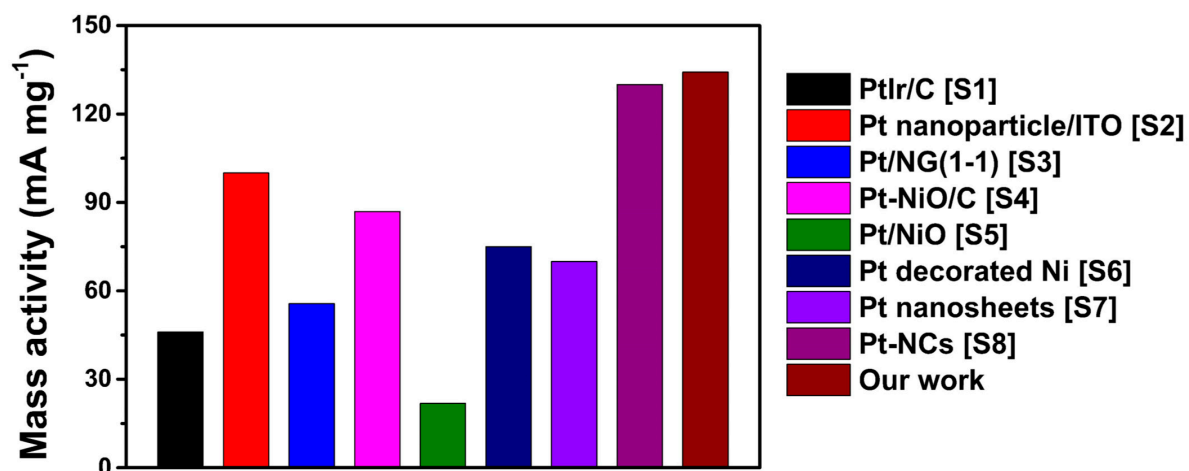

**Figure S6** Comparison of mass activity for AOR over Pt-based catalysts with reported AOR literatures at low temperatures.

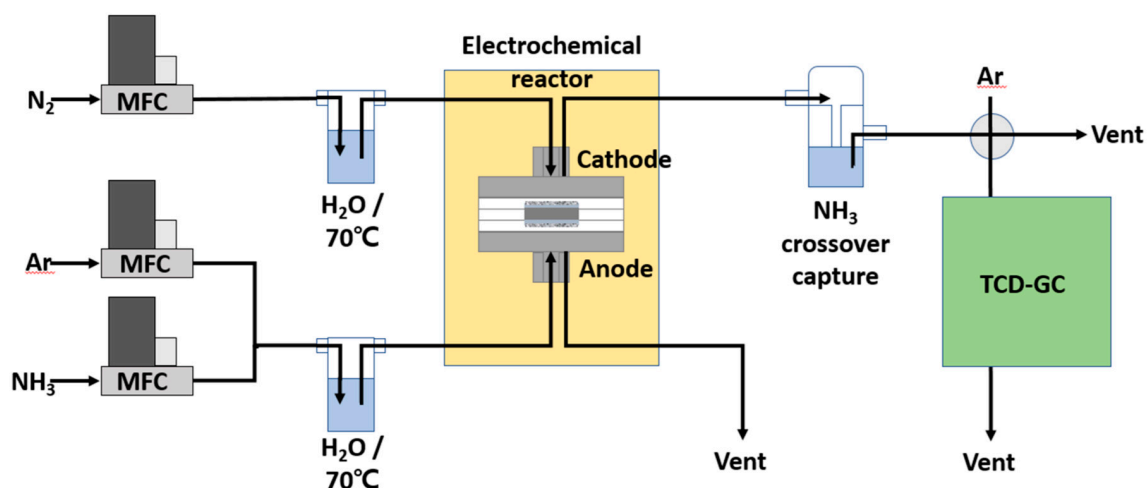

**Figure S7** Schematic illustration of the overall AOR process with the SAEC system.

### Reference for Figure S6.

- [S1] Song, L.; Liang, Z.; Ma, Z.; Zhang, Y.; Chen, J.; Adzic, R.R.; Wang, J.X. Temperature-Dependent Kinetics and Reaction Mechanism of Ammonia Oxidation on Pt, Ir, and PtIr Alloy Catalysts. *J. Electrochem. Soc.* **2018**, *165*, J3095-J3100. doi:10.1149/2.0181815jes.
- [S2] Li, S.; Chen, H.; Liu, J.; Deng, Y.; Han, X.; Hu, W.; Zhong, C. Size- and Density-Controllable Fabrication of the Platinum Nanoparticle/ITO Electrode by Pulse Potential Electrodeposition for Ammonia Oxidation. *ACS Appl. Mater. Interface* **2017**, *9*, 27765-27772. doi:10.1021/acsami.7b08604.
- [S3] Zhou, Y.F.; Zhang, G.Q.; Gong, Z.; Shang, X.L.; Yang, F.L. Potentiodynamic Uniform Anchoring of Platinum Nanoparticles on N-Doped Graphene with Improved Mass Activity for the Electrooxidation of Ammonia. *ChemElectroChem* **2016**, *3*, 605-614. doi:10.1002/celec.201500478.
- [S4] Kang, Y.; Wang, W.; Li, J.; Li, Q.; Liu, S.; Lei, Z. A Highly Efficient Pt-NiO/C Electrocatalyst for Ammonia Electro-Oxidation. *J. Electrochem. Soc.* **2017**, *164*, F958-F965. doi:10.1149/2.1051709jes.
- [S5] Ntais, S.; Serov, A.; Andersen, N.I.; Roy, A.J.; Cossar, E.; Allagui, A.; Lu, Z.Z.; Cui, X.Y.; Baranova, E.A.; Atanasov, P. Promotion of Ammonia Electrooxidation on Pt nanoparticles by Nickel Oxide Support. *Electrochim. Acta* **2016**, *222*, 1455-1463. doi:10.1016/j.electacta.2016.11.124.
- [S6] Liu, J.; Chen, B.; Kou, Y.; Liu, Z.; Chen, X.; Li, Y.; Deng, Y.; Han, X.; Hu, W.; Zhong, C. Pt-Decorated highly porous flower-like Ni particles with high mass activity for ammonia electro-oxidation. *J. Mater. Chem. A* **2016**, *4*, 11060-11068. doi:10.1039/C6TA02284G.
- [S7] Du, X.T.; Yang, Y.; Liu, J.; Liu, B.; Liu, J.B.; Zhong, C.; Hu, W.B. Surfactant-free and template-free electrochemical approach to prepare well-dispersed Pt nanosheets and their high electrocatalytic activities for ammonia oxidation. *Electrochim. Acta* **2013**, *111*, 562-566. doi:10.1016/j.electacta.2013.08.042.
- [S8] Sun, H.-Y.; Xu, G.-R.; Li, F.-M.; Hong, Q.-L.; Jin, P.-J.; Chen, P.; Chen, Y. Hydrogen generation from ammonia electrolysis on bifunctional platinum nanocubes electrocatalysts. *J. Energy Chem.* **2020**, *47*, 234-240. doi:10.1016/j.jechem.2020.01.035.
